# Supplementary material for: Modeling impacts of ice-nucleating particles from marine aerosols on mixed-phase orographic clouds during 2015 ACAPEX field campaign
Source: Copernicus journal article supplement (doi:10.5194/acp-22-6749-2022), 2022-05-24
Supplement: Supplementary file 1 [file acp-22-6749-2022-supplement.pdf]

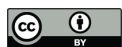

*Supplement of*

**Modeling impacts of ice-nucleating particles from marine aerosols on mixed-phase orographic clouds during 2015 ACAPEX field campaign**

**Yun Lin et al.**

*Correspondence to:* Jiwen Fan ([jiwen.fan@pnnl.gov](mailto:jiwen.fan@pnnl.gov))

The copyright of individual parts of the supplement might differ from the article licence.

## Support information

This file includes

Table S1

Fig. S1-S3

**Table S1.** Emissions in California based on EPA NEI in 2010, 2012, and 2014 (unit of 1000 tons).

| Species           | 2010     | 2012     | 2014     |
|-------------------|----------|----------|----------|
| CO                | 9601.807 | 3445.952 | 5607.007 |
| NH <sub>3</sub>   | 1273.116 | 850.5079 | 510.4905 |
| NO <sub>x</sub>   | 851.5883 | 674.9153 | 585.4978 |
| PM <sub>10</sub>  | 1198.705 | 469.3941 | 714.4845 |
| PM <sub>2.5</sub> | 712.6443 | 200.5515 | 403.0768 |
| SO <sub>2</sub>   | 75.54085 | 33.26507 | 47.19099 |
| VOC               | 2202.771 | 842.6653 | 1471.331 |

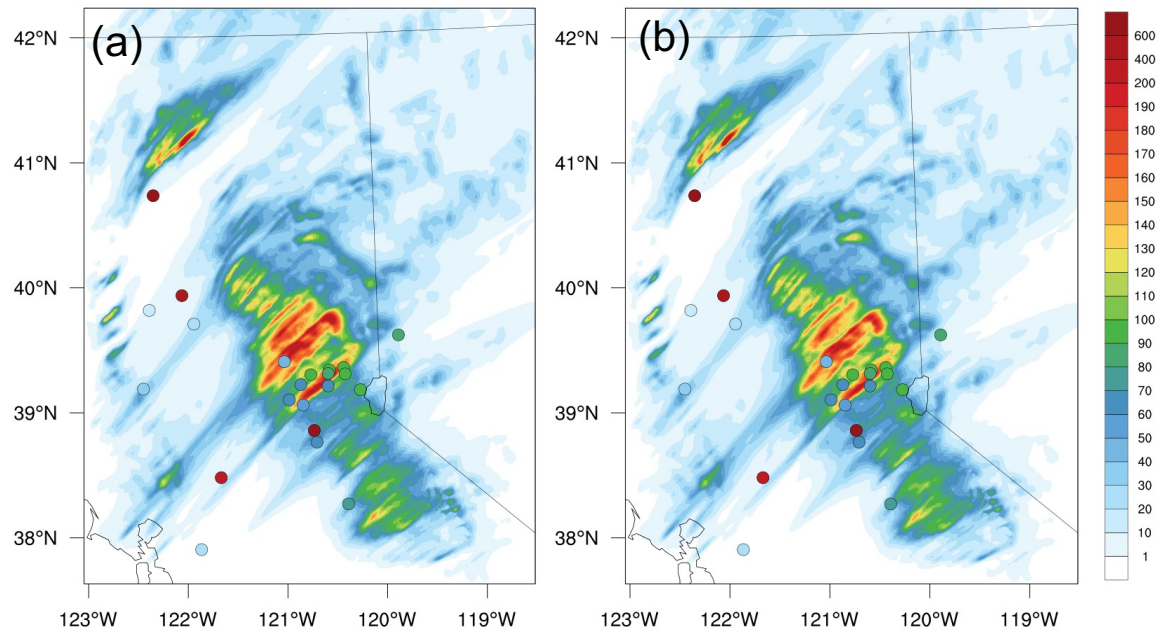

**Figure S1.** Modeled daily accumulated precipitation from (a) the simulation using WRF-Chem-SBM fully-coupled model and (b) the simulation using WRF-SBM with the aerosols hourly interpreted from a coarse resolution WRF-Chem simulation for 07 February during 00:00-23:00 UTC. The overlaid circles are the rain gauge measurements.

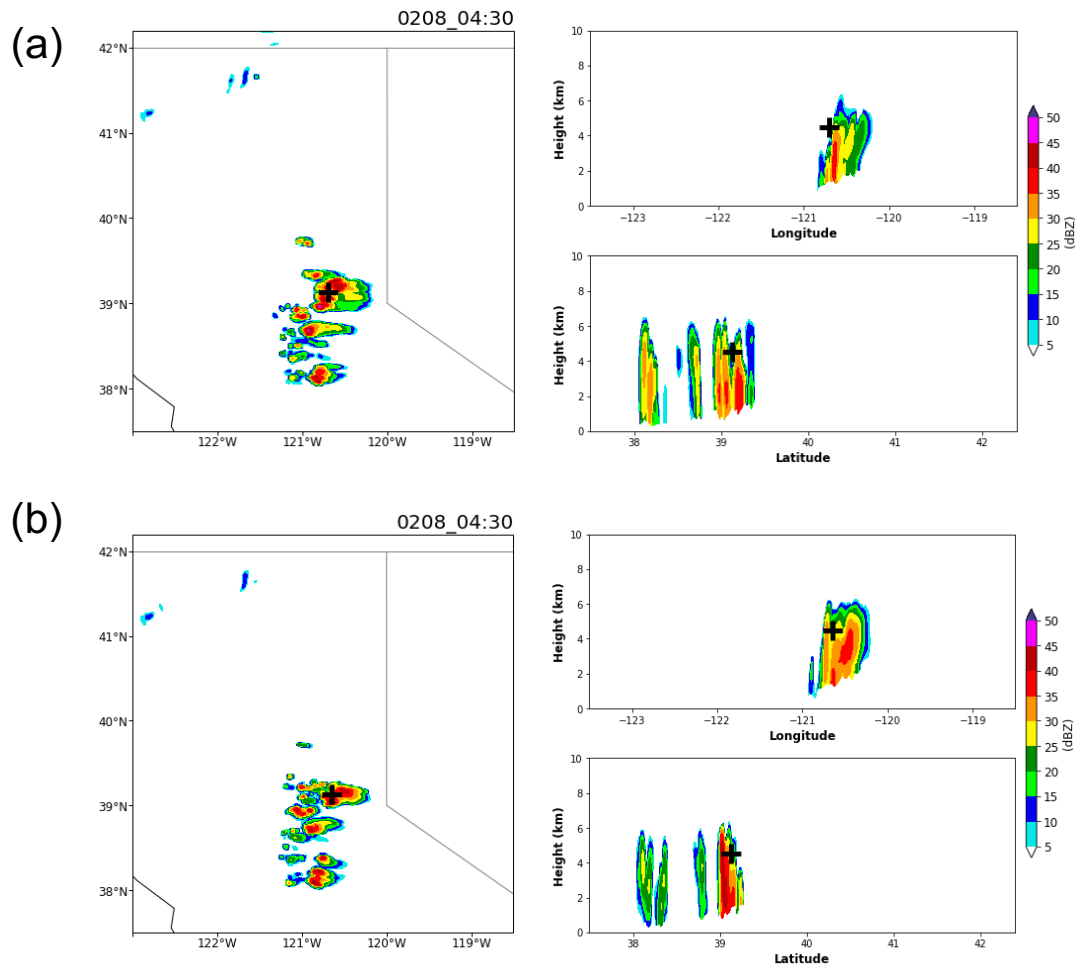

**Figure S2.** Same as Figure 5b, except for the simulations of (a) Bigg and (b) DM15.

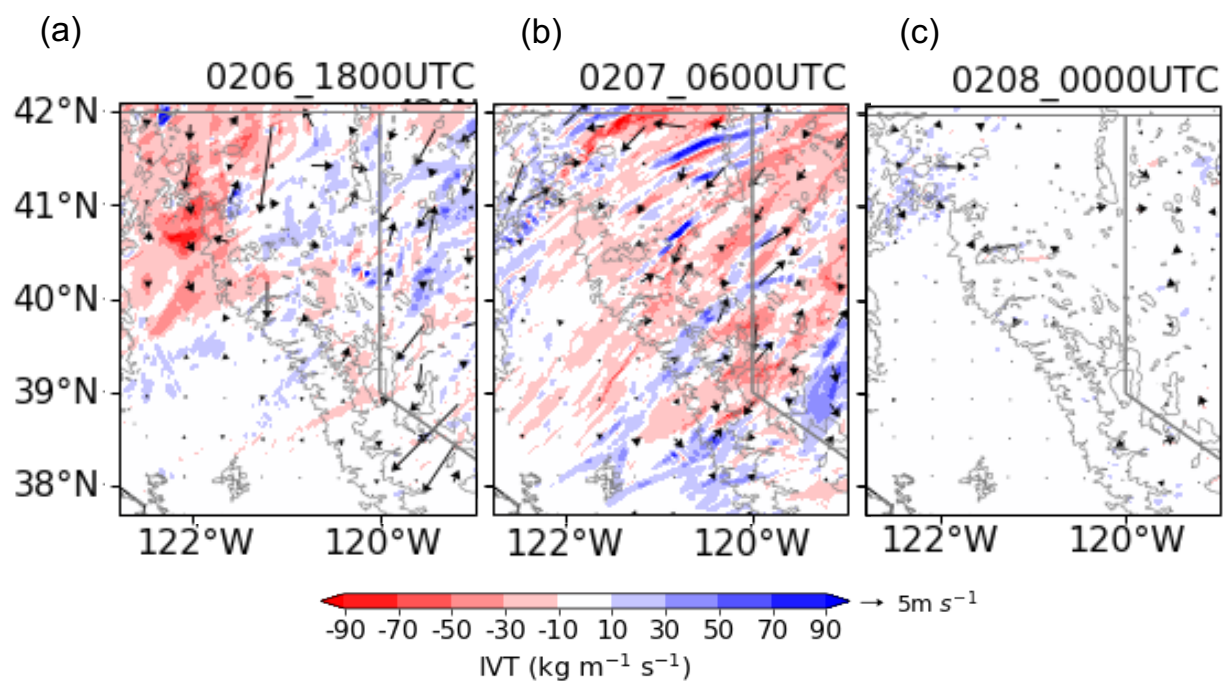

**Figure S3.** Differences of IVT (color) and wind (vector) between DM15+MC18 and DM15 at a time from the stages (a) before landfall, (b) after landfall, and (c) post-AR.
